# Supplementary material
Source: PubMed Central journal article supplement (PMC2593651)
Supplement: pp.108.130575_1.pdf [file pp.108.130575_1.pdf]

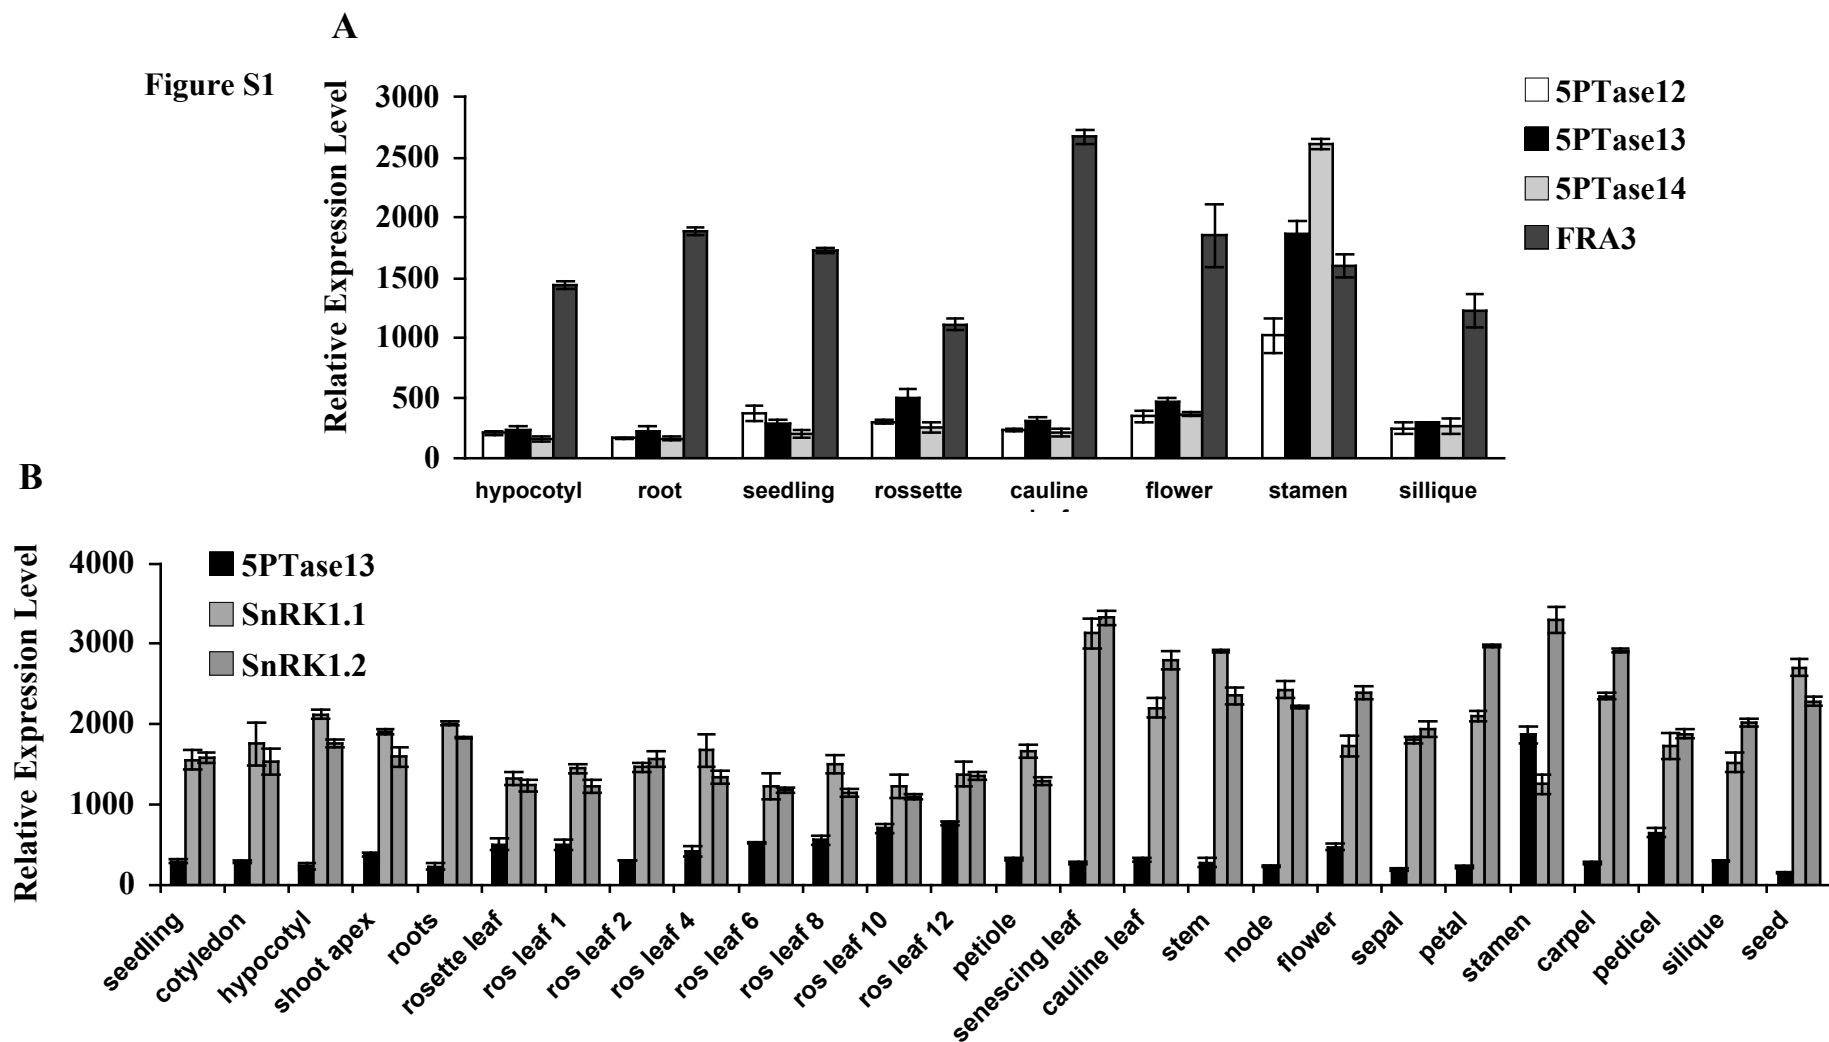

**Figure S1.** A. Genevestigator Expression Analysis of 5PTase12, 13, 14 and FRA3. Data from the Genevestigator web site was analyzed and plotted. B. Genevestigator Expression in tissues of 5PTase13 as compared to SnRK1.1 and SnRK1.2. Error bars are standard deviation.
