# Supplementary material
Source: PubMed Central journal article supplement (PMC2593651)
Supplement: pp.108.130575_2.pdf [file pp.108.130575_2.pdf]

Figure S2

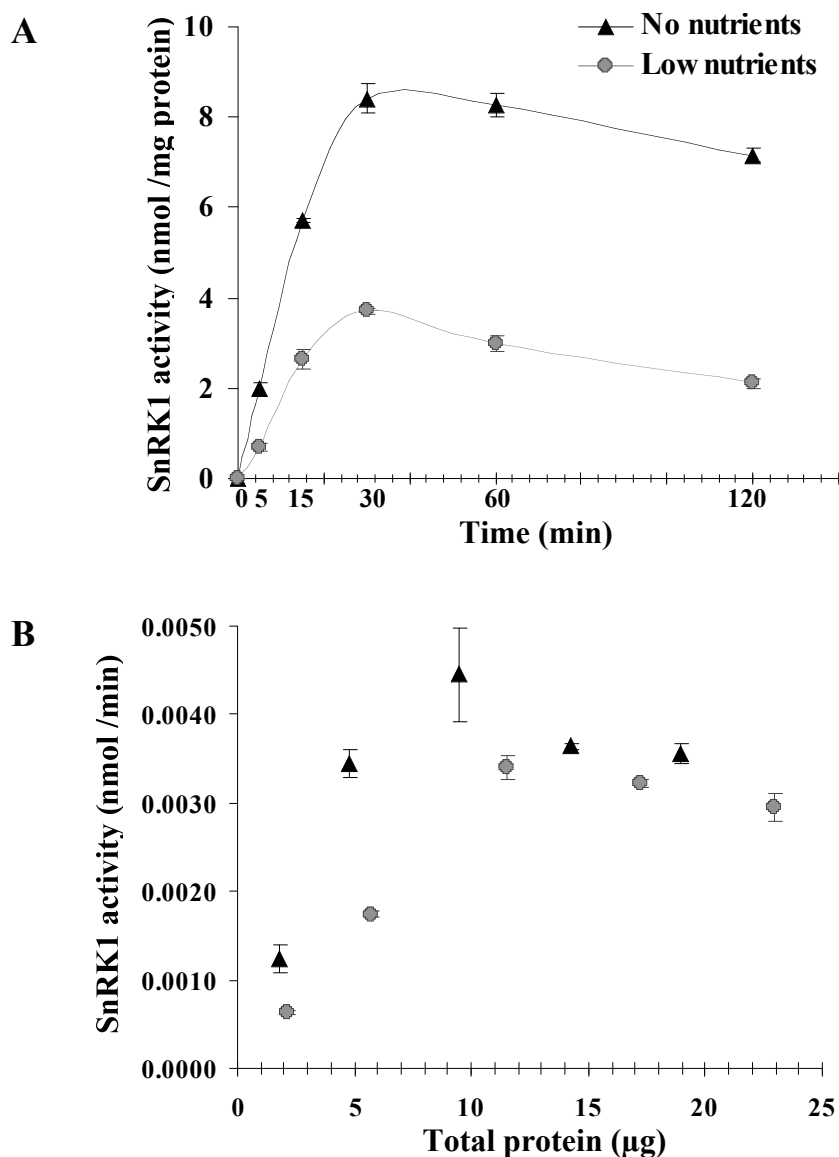

**Figure S2.** Validation of SnRK1 activity assay. Seed from wild-type (WT2-CS60000) plants were grown on 0.8% agar and with no nutrients (black triangles) or low nutrients (gray circles, 0.5xMS) under low light for 7 days. SnRK1 activity was measured from crude plant extracts precipitated with ammonium sulfate according to the method described (Radchuk et al., 2006). A. Time course of product accumulation. For two different nutrient conditions, SnRK1 activity is linear over 30 min. B. Varying extract amount. 20µl reactions were incubated at 30 °C with varying amounts of protein extract. SnRK1 activity is linear with up to 9.48/11.48 µg total protein (no nutrients/low nutrients) respectively. 5 µg protein was used in SnRK1 activity assay in Figures 5 and 6. Bars represent the mean  $\pm$  SE of 3 replicates, a p value  $<$  0.05 as compared to no nutrients.
