# Supplementary material
Source: PubMed Central journal article supplement (PMC2593651)
Supplement: pp.108.130575_4.pdf [file pp.108.130575_4.pdf]

Figure S4

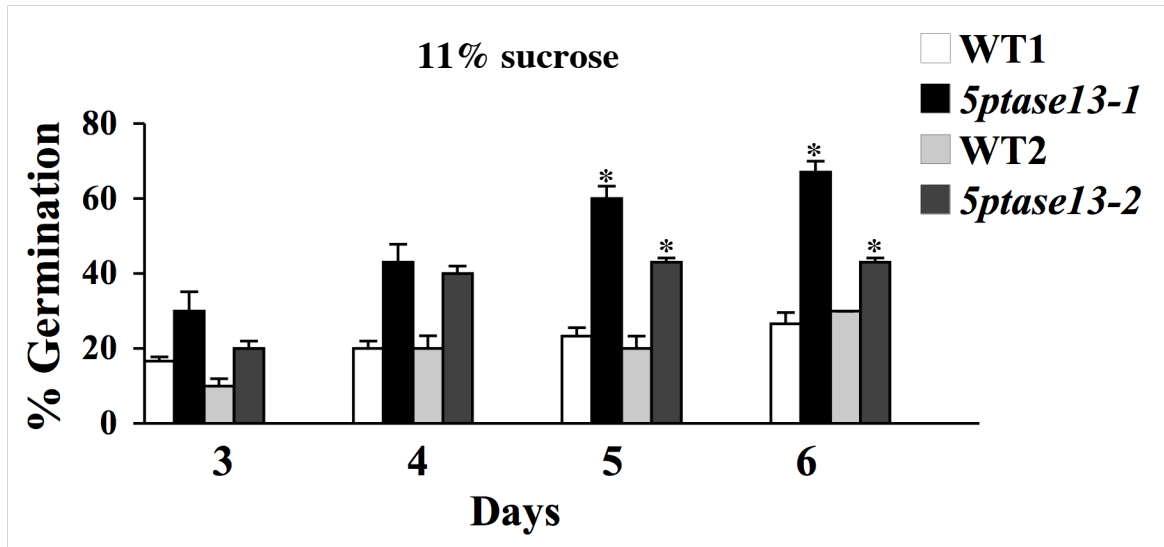

**Figure S4.** *5ptase13* mutants are less sensitive to 11% sucrose under light. WT and *5ptase13* mutant seed were germinated and grown in the light for 6 days on 0.5xMS salts, 0.8% agar, and 11% sucrose. Germination rate was scored for each group of seeds starting from day 3. Values are means  $\pm$  SE (n = 50). \* indicates p value of < 0.05 as compared to WT. The data are representative of three independent experiments.
